# Supplementary material for: General strategy for developing thick-film micro-thermoelectric coolers from material fabrication to device integration
Source: PubMed Central journal article supplement (PMC11079074; doi:10.1038/s41467-024-48346-6), 2024-05-08

## Lasing Reporting Summary

Nature Research wishes to improve the reproducibility of the work that we publish. This form is intended for publication with all accepted papers reporting claims of lasing and provides structure for consistency and transparency in reporting. Some list items might not apply to an individual manuscript, but all fields must be completed for clarity.

For further information on Nature Research policies, including our [data availability policy](#), see [Authors & Referees](#).

### ► Experimental design

#### Please check: are the following details reported in the manuscript?

##### 1. Threshold

Plots of device output power versus pump power over a wide range of values indicating a clear threshold  Yes  No

The purpose of laser in this paper is only to cut materials, in which a proper power is enough. So there is no need to confirm threshold.

##### 2. Linewidth narrowing

Plots of spectral power density for the emission at pump powers below, around, and above the lasing threshold, indicating a clear linewidth narrowing at threshold  Yes  No

The purpose of laser in this paper is only to cut materials, in which a proper power is enough. So there is no need to confirm threshold.

Resolution of the spectrometer used to make spectral measurements  Yes  No

The purpose of laser in this paper is only to cut materials.

##### 3. Coherent emission

Measurements of the coherence and/or polarization of the emission  Yes  No

The purpose of laser in this paper is only to cut materials.

##### 4. Beam spatial profile

Image and/or measurement of the spatial shape and profile of the emission, showing a well-defined beam above threshold  Yes  No

The purpose of laser in this paper is only to cut materials.

##### 5. Operating conditions

Description of the laser and pumping conditions  Yes  No  
*Continuous-wave, pulsed, temperature of operation*

This information can be found in "Methods" Section.

Threshold values provided as density values (e.g. W cm<sup>-2</sup> or J cm<sup>-2</sup>) taking into account the area of the device  Yes  No

The purpose of laser in this paper is only to cut materials, in which a proper power is enough. So there is no need to confirm threshold.

##### 6. Alternative explanations

Reasoning as to why alternative explanations have been ruled out as responsible for the emission characteristics  Yes  No  
*e.g. amplified spontaneous, directional scattering; modification of fluorescence spectrum by the cavity*

The purpose of laser in this paper is only to cut materials.

##### 7. Theoretical analysis

Theoretical analysis that ensures that the experimental values measured are realistic and reasonable  Yes  No  
*e.g. laser threshold, linewidth, cavity gain-loss, efficiency*

The purpose of laser in this paper is only to cut materials.

##### 8. Statistics

Number of devices fabricated and tested  Yes  No

The purpose of laser in this paper is only to cut materials, not to fabricate devices.

Statistical analysis of the device performance and lifetime (time to failure)  Yes  No

The purpose of laser in this paper is only to cut materials.

## ► Further reading

We also suggest that authors read the following literature, which describes the important principles and signatures of laser emission and discusses some of the common mistakes that can occur during laser characterization.

1. Samuel I.D.W., Namdas, E.B. & Turnbull, G.A. [How to recognize lasing](#). *Nat. Photon.* **3**, 546-549 (2009).
2. Siegmann, A.E. *Lasers*. (University Science Books, 1990)
3. Svelto, O. *Principles of Lasers*. 5th edn. (Springer 2010)
4. Blood, P. *Quantum Confined Laser Devices: Optical Gain and Recombination in Semiconductors*. (Oxford Univ. Press, 2015)
5. Koxlov, V.G. *et al.* [Laser action in organic semiconductor waveguide and double-heterostructure devices](#). *Nature* **389**, 362-364 (1997).

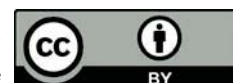

Supplement: 41467_2024_48346_MOESM4_ESM.pdf [file 41467_2024_48346_MOESM4_ESM.pdf]
